# Supplementary material for: A Pilot Study of Team-based Learning in Paediatric Clerkships
Source: Research Square preprint supplement (doi:10.21203/rs.3.rs-40391/v3), 2021-01-08
Supplement: Supplementary file 1 [file d0c1e69bfdd22dffb32c2b9c.docx]

The ratio of each topic in the theoretical exam

| Topics | Percentage in the theoretical exam (%) |
| --- | --- |
| Tuberculosis and measles | 5 |
| The introduction of neonatology, neonatal respiratory tract disorders, Neonatal hypoxic-ischemic encephalopathy, and neonatal jaundice | 19 |
| congenital hypothyroidism, diabetes mellitus and precocious puberty | 9 |
| infantile diarrhoea with fluid therapy and gastroesophageal reflux | 9 |
| Asthma and pneumonia | 9 |
| Glomerulonephritis, nephrotic syndrome, and urinary tract infections | 9 |
| Infection disease of central nervous system | 9 |
| The hematopoietic system and the anemias, immunodeficiency disease | 9 |
| Congenital heart disease | 9 |
| Down’s syndrome, phenylketonuria | 5 |
| Rheumatic disease | 8 |
